# Supplementary material for: Integrated foam fractionation for heterologous rhamnolipid production with recombinant Pseudomonas putida in a bioreactor
Source: PubMed Central journal article supplement (PMC4747948; doi:10.1186/s13568-016-0183-2), 2016-02-09
Supplement: 13568_2016_183_MOESM1_ESM.pdf [file 13568_2016_183_MOESM1_ESM.pdf]

1 **Table 1 Sequence of the synthetic oligonucleotide Term-lov-Term**

2

---

AAAAGATCTCCAGGCATCAAATAAAACGAAAGGCTCAGTCGAAAGACTGGGCCTTTCGTTTTATCTG  
TTGTTTGTCTGGTGAACGCTCTCTACTAGAGTCACACTGGCTCACCTTCGGGTGGGCCTTCTGCGTTT  
ATAACGCGTAATAAAATATTGGCGCGCCTTTAAGAAGGAGATATACATATGGCGTCGTTCCAGTCGT  
TCGGCATCCCGGGCCAGCTGGAAGTCATCAAGAAGGCGCTGGATCACGTGCGCGTCGGCGTGGTCA  
TCACCGATCCCGCGCTGGAAGATAACCCGATCGTCTACGTGAACCAGGGCTTCGTGCAGATGACCGG  
CTACGAGACCGAGGAAATCCTGGGCAAGAACGCGCGCTTCCTCCAGGGGAAGCACACCGATCCGGC  
GGAAGTGGACAACATCCGCACCGCGCTGCAAAATAAAGAACCGGTCACCGTGCAGATCCAGAATA  
CAAGAAGGACGGCACGATGTTCTGGAACGAACTGAACATCGATCCGATGGAAATCGAGGATAAGAC  
GTATTCGTCTGGCATCCAGAACGACATCACCAAGCAGAAGGAATATGAAAAGCTGCTCGAGCACCAC  
CACCACCACACTGAGGCGCGCCCCAGGCATCAAATAAAACGAAAGGCTCAGTCGAAAGACTGGGC  
CTTTCGTTTTATCTGTTGTTTGTCTGGTGAACGCTCTCTACTAGAGTCACACTGGCTCACCTTCGGGTG  
GCCTTCTGCGTTTATACTTAAGAAAA

---

3
